# Supplementary material for: Epigenome-wide meta-analysis of blood DNA methylation and its association with subcortical volumes: findings from the ENIGMA Epigenetics Working Group
Source: PubMed Central journal article supplement (PMC8550939; doi:10.1038/s41380-019-0605-z), 2019-12-06

Supplementary Figure 1

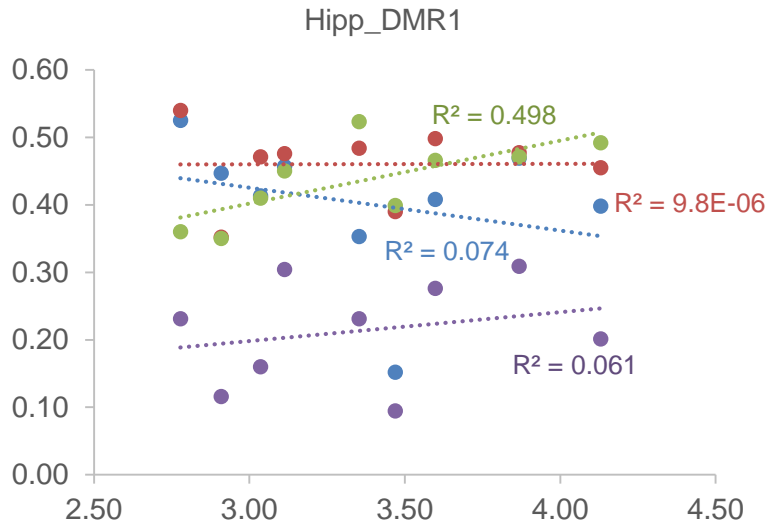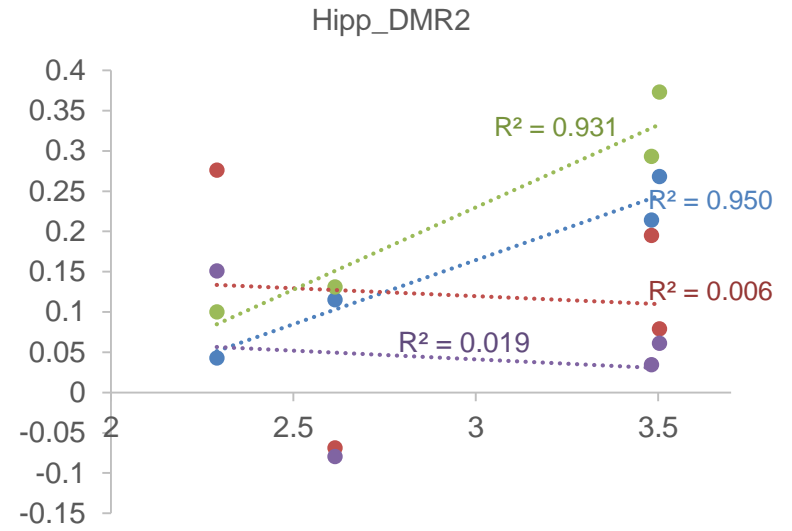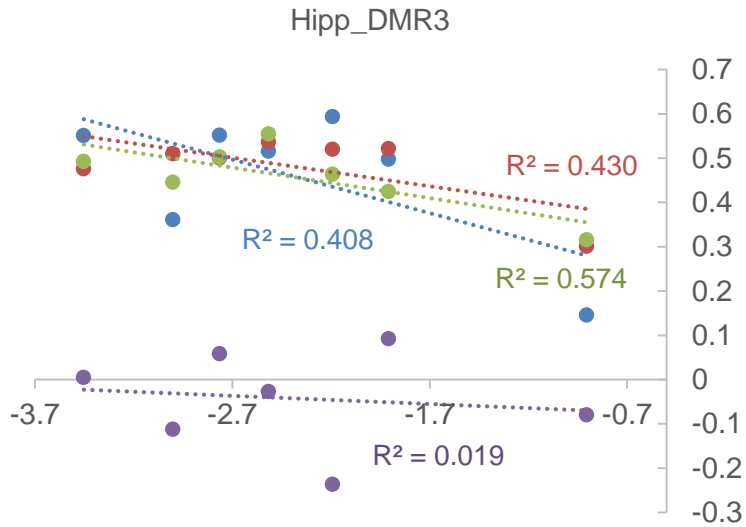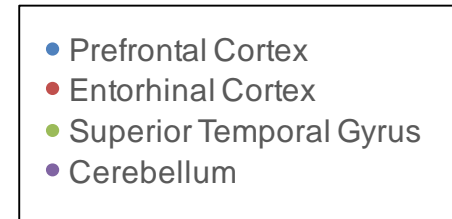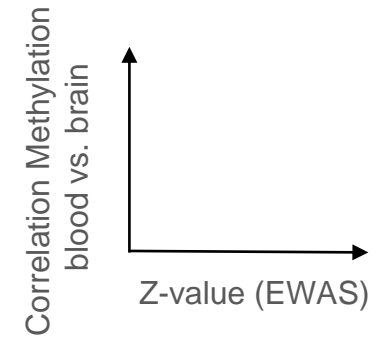

Supplementary Figure 2

| Chr        | Coor | Gene(s)  | Gene Region(s)           | Variability                      |      |      |       | Correlation |       |       | Cell Composition |       |      |
|------------|------|----------|--------------------------|----------------------------------|------|------|-------|-------------|-------|-------|------------------|-------|------|
|            |      |          |                          | BA10                             | BA20 | BA7  | Blood | BA10        | BA20  | BA7   | Blood            | Brain |      |
| cg10299976 | 10   | 94455543 | HHEX                     | three_plus                       | 0.1  | 0.08 | 0.06  | 0.16        | -0.14 | -0.35 | -0.05            | 0.03  | 0.01 |
| cg14987431 | 10   | 94455650 | HHEX                     | three_plus                       | 0.05 | 0.05 | 0.05  | 0.12        | 0     | -0.22 | -0.05            | 0.01  | 0.01 |
| cg07856667 | 10   | 94455710 | None                     | intergenic                       | 0.07 | 0.06 | 0.06  | 0.15        | 0.16  | -0.01 | 0.32             | 0.02  | 0.01 |
| cg26194475 | 10   | 94455895 | None                     | intergenic                       | 0.06 | 0.05 | 0.05  | 0.1         | 0.34  | 0.21  | -0.01            | 0.02  | 0.01 |
| cg08260245 | 22   | 51016501 | CHKB-CPT1B, CPT1B, CPT1B | intragenic, intragenic, promoter | 0.2  | 0.19 | 0.16  | 0.23        | 0.59  | 0.52  | 0.65             | 0.03  | 0.02 |
| cg10490842 | 22   | 51016604 | CHKB-CPT1B, CPT1B, CPT1B | intragenic, intragenic, promoter | 0.13 | 0.12 | 0.09  | 0.23        | 0.73  | 0.58  | 0.69             | 0.03  | 0.01 |
| cg19112186 | 22   | 51016638 | CHKB-CPT1B, CPT1B, CPT1B | intragenic, intragenic, promoter | 0.16 | 0.2  | 0.17  | 0.25        | 0.72  | 0.47  | 0.75             | 0.03  | 0.02 |
| cg10770023 | 22   | 51016644 | CHKB-CPT1B, CPT1B, CPT1B | intragenic, intragenic, promoter | 0.17 | 0.19 | 0.15  | 0.24        | 0.86  | 0.44  | 0.66             | 0.03  | 0.01 |
| cg05156901 | 22   | 51016646 | CHKB-CPT1B, CPT1B, CPT1B | intragenic, intragenic, promoter | 0.2  | 0.19 | 0.16  | 0.28        | 0.76  | 0.33  | 0.42             | 0.04  | 0.01 |
| cg24363820 | 22   | 51016703 | CHKB-CPT1B, CPT1B, CPT1B | intragenic, intragenic, promoter | 0.17 | 0.16 | 0.12  | 0.26        | 0.76  | 0.39  | 0.59             | 0.03  | 0.01 |
| cg00047287 | 22   | 51016899 | CHKB-CPT1B, CPT1B        | intragenic, promoter             | 0.09 | 0.12 | 0.1   | 0.13        | 0.53  | 0.65  | 0.37             | 0.02  | 0.01 |
| cg09481121 | 5    | 78985425 | CMYA5                    | promoter                         | 0.11 | 0.11 | 0.07  | 0.15        | 0.19  | -0.03 | 0.26             | 0.03  | 0.01 |
| cg00611789 | 5    | 78985432 | CMYA5                    | promoter                         | 0.12 | 0.13 | 0.09  | 0.22        | 0.06  | -0.19 | 0.33             | 0.05  | 0.01 |
| cg11438310 | 5    | 78985434 | CMYA5                    | promoter                         | 0.1  | 0.09 | 0.09  | 0.21        | 0.28  | -0.13 | 0.24             | 0.04  | 0.01 |
| cg10257870 | 5    | 78985484 | CMYA5                    | promoter                         | 0.11 | 0.12 | 0.09  | 0.18        | 0.04  | -0.04 | 0.13             | 0.04  | 0    |
| cg03546977 | 5    | 78985489 | CMYA5                    | promoter                         | 0.09 | 0.11 | 0.09  | 0.17        | 0.28  | 0.04  | 0.18             | 0.03  | 0    |
| cg09655403 | 5    | 78985495 | CMYA5                    | promoter                         | 0.11 | 0.1  | 0.11  | 0.18        | -0.07 | -0.01 | 0.17             | 0.04  | 0.01 |
| cg15197065 | 5    | 78985562 | CMYA5                    | promoter                         | 0.14 | 0.11 | 0.09  | 0.18        | 0.2   | -0.06 | 0.32             | 0.04  | 0.01 |
| cg04154027 | 5    | 78985588 | CMYA5                    | promoter                         | 0.17 | 0.15 | 0.11  | 0.2         | 0.13  | 0.11  | 0.47             | 0.04  | 0.01 |
| cg23279355 | 5    | 78985592 | CMYA5                    | promoter                         | 0.13 | 0.11 | 0.09  | 0.27        | 0.3   | 0.05  | 0.37             | 0.05  | 0.01 |

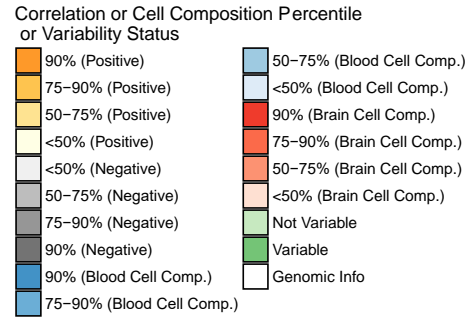

### Supplementary Figure 3

#### CMYA5 (ENSG00000164309.10) and rs4441859 (5\_78996244\_A\_G\_b37)

Normalized Expression

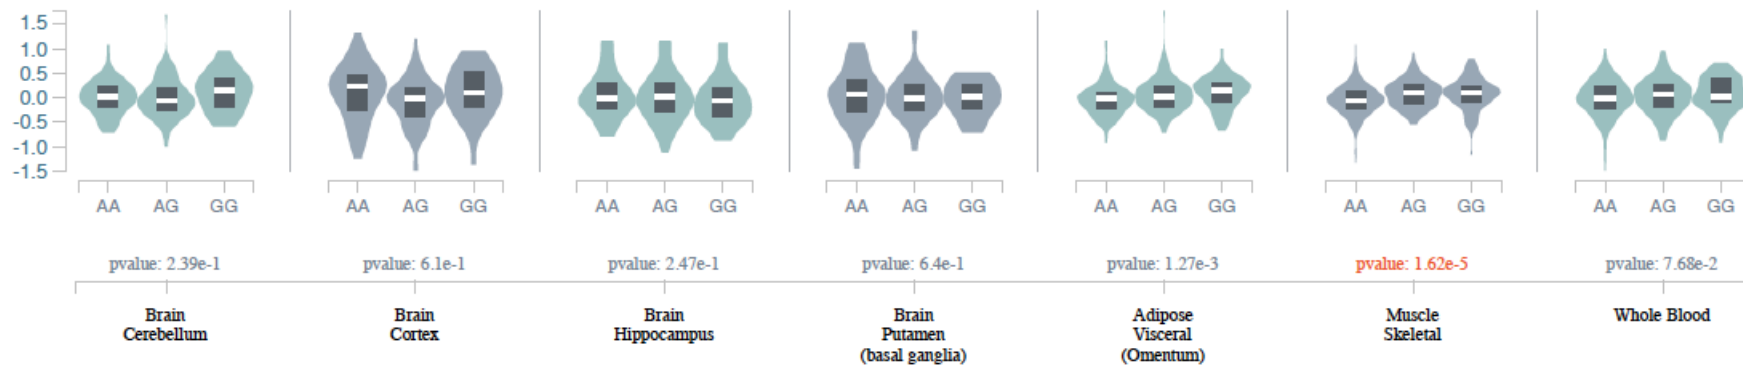

#### CPT1B (ENSG00000205560.8) and rs131758 (22\_51017082\_T\_A\_b37)

Normalized Expression

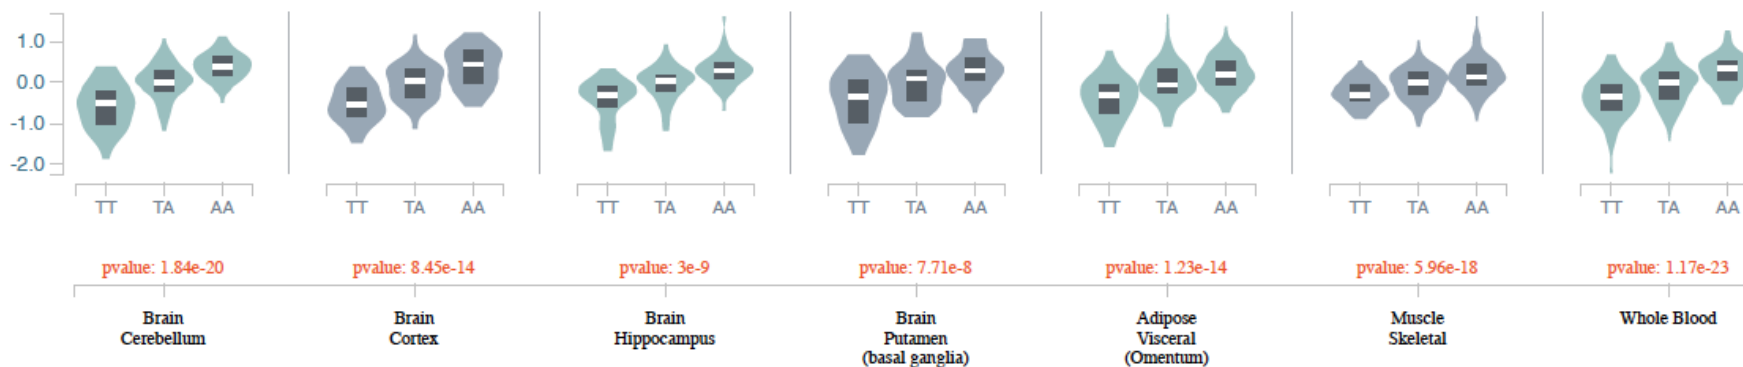

Supplement: 41380_2019_605_MOESM2_ESM.pdf [file 41380_2019_605_MOESM2_ESM.pdf]
