# Supplementary material for: Epigenome-wide meta-analysis of blood DNA methylation and its association with subcortical volumes: findings from the ENIGMA Epigenetics Working Group
Source: PubMed Central journal article supplement (PMC8550939; doi:10.1038/s41380-019-0605-z), 2019-12-06
Supplement: 41380_2019_605_MOESM1_ESM.pdf [file 41380_2019_605_MOESM1_ESM.pdf]

1 **SUPPLEMENTARY MATERIAL AND METHODS**

2

3 **Subjects and brain measures**

4 The brain phenotypes examined in this study are from the ENIGMA analysis of  
5 high-resolution MRI brain scans of volumetric measures (full details in <sup>1</sup>). Our  
6 analyses were focussed to mean (of left and right hemisphere) volumetric  
7 measures of three subcortical areas: the hippocampus, thalamus and nucleus  
8 accumbens, selected for their link to disease, different levels of heritability, and  
9 developmental trajectories. MRI brain scans and genome-wide DNA  
10 methylation data were available for 3,337 subjects from 11 cohorts  
11 (Supplementary Table 1). All participants in all cohorts in this study gave written  
12 informed consent and sites involved obtained approval from local research  
13 ethics committees or Institutional Review Boards.

14

15 **DNA methylation microarray processing and normalization**

16 Blood DNA methylation was assessed for each study using the Illumina  
17 HumanMethylation450 (450k) microarray, which measures CpG methylation  
18 across >485,000 probes covering 99% of RefSeq gene promoters <sup>2</sup>, following  
19 the manufacturer's protocols.

20 Quality control procedures and quantile normalization were performed  
21 using the *minfi* Bioconductor package in R <sup>3</sup>. Briefly, red and green channels

22 intensities were mapped to the methylated and unmethylated status, and  
23 average intensities used to check for low quality samples. Initial quality  
24 assessment of methylation data was performed using the preprocessIllumina  
25 option. Principal component analyses (PCA) were performed using the singular  
26 value decomposition method, to identify methylation outliers based on the first  
27 four components. Samples with intensities more than 3 standard deviations  
28 away from the median were considered outliers and were removed. Intensities  
29 from the sex chromosomes were used to predict sex, and samples with  
30 predicted sex different from their recorded value were removed. Samples that  
31 were initially processed in batches were merged at this stage before further  
32 preprocessing. Stratified quantile normalization was then applied across  
33 samples. The data were then normalized together using the *minfi*  
34 `preprocessQuantile` function <sup>4</sup>. PCA of normalized beta values were used to  
35 control for unknown structure in the methylation data. Most cohorts estimated  
36 the cell counts for the 6 major cell types in blood (granulocytes, B cells, CD4+  
37 T cells, CD8+ T cells, monocytes and NK cells) for each individual by  
38 implementing the `estimateCellCounts` function in *minfi*, which gives sample-  
39 specific estimates of cell proportions based on reference information on cell-  
40 specific methylation signatures. Other cohorts (i.e., NTR) measured cells  
41 counts directly.

42

### 43 **Epigenome-wide association analysis**

44 Epigenome-wide association studies with volumes of the thalamus,  
45 hippocampus and NAcc were performed for each site separately. After  
46 normalization, probes on the sex chromosomes were filtered out (which are  
47 more difficult to accurately normalize), as were probes not detected (detection  
48 p-value > 0.01) in more than 20% of samples and probes containing a SNP  
49 (minor allele frequency  $\geq 0.05$ ) at the CpG or at the single nucleotide extension  
50 site.

51 We modelled association of DNA methylation and mean brain volumes  
52 in the hippocampus, thalamus and NAcc using linear regression analyses.  
53 Control variables included sex, age, age<sup>2</sup>, intracranial volume, methylation  
54 composition (the first 4 principal components of the methylation data), and  
55 blood cell-type composition (first two components of estimated cell-type  
56 proportion) and depending on the sample and disease status (when applicable).  
57 For studies with data collected across several centres, dummy-coded  
58 covariates were also included in the model. Cohorts with family data (NTR,  
59 QTIM) performed association analyses using generalized estimating equation  
60 to control for familial relationship in addition to the other covariates. Our  
61 analyses focused on the full set of subjects, including patients, to maximise the  
62 power to detect effects. We also re-analysed the data excluding patients to  
63 ensure that the effects detected were not driven by disease.

64 The EWAS results from each site were uploaded to a central server for  
65 meta-analyses. Cross-reactive probes were further removed from the EWAS  
66 result files from each site, leaving 397,164 probes for subsequent analysis.  
67 Results from each cohort were meta-analysed by combining correlations  
68 across all 11 cohorts with fixed effect model, weighting for sample size <sup>5</sup>. False  
69 discovery rates (FDR) were computed (correcting for the number of brain  
70 regions tested and the number of DNA methylation probes) and FDR < 0.05  
71 was considered statistically significant. The protocols used for testing  
72 association and meta-analysis and the meta-analytic results will be freely  
73 available from the ENIGMA consortium webpage upon publication  
74 (<http://enigma.ini.usc.edu/protocols/> and  
75 <http://enigma.ini.usc.edu/research/downloadenigma-gwas-results>).

76

### 77 **Identification of differentially methylated regions (DMRs)**

78 We identified DMRs by applying the *Comb-p* algorithm <sup>6</sup> on the meta-analysis  
79 of hippocampal volume. *Comb-p* adjusts *p*-values for genomic autocorrelation  
80 (ACF), identifies enriched regions of low *p*-values, and performs inference on  
81 putative DMRs using Sidák multiple testing correction <sup>7</sup>. The ACF distance was  
82 set to 500bp and the *p*-value threshold required for a DMR at *p* < 0.05. DMRs  
83 contained a minimum of 2 CpG sites.

84

## 85 **Effects of methylation on gene expression**

86 Effects of DNA methylation on gene expression were investigated in 631  
87 subjects of the IMAGEN sample for which gene expression data were available.  
88 Total RNA was extracted from whole blood cells collected at the age of 14 using  
89 the PAXgene Blood RNA Kit (QIAGEN Inc., Valencia, CA). Following quality  
90 control of the total RNA extracted, labeled complementary RNA (cRNA) was  
91 generated using the Illumina® TotalPrep™ RNA Amplification kit (Applied  
92 Biosystems/Ambion, Austin, TX). The size distribution of cRNA was determined  
93 through Bioanalyzer (Agilent Technologies, Santa Clara, CA) using the  
94 Eukaryotic mRNA Assay with smear analysis. Gene expression profiling was  
95 performed using Illumina HumanHT-12 v4 Expression BeadChips (Illumina Inc.,  
96 San Diego, CA). Expression data were normalized using the mloess method <sup>8</sup>.  
97 Expression data for genes mapping the top two CpG sites and DMRs  
98 associated with hippocampus volume. These included *BAIAP2* (probes  
99 ILMN\_1705922, ILMN\_1652865, ILMN\_1699727, ILMN\_2247226 and  
100 ILMN\_2258749), *ECH1* (ILMN\_1653115), *CMYA5* (ILMN\_1805765) and its  
101 neighbouring genes *MTX3* (ILMN\_1679071) and *PAPD4* (ILMN\_1681845)  
102 genes, *HHEX* (ILMN\_1762712) and *CPT1B* (ILMN\_1791754). Expression data  
103 were log-transformed before analyses. For each DMR, a single DNA  
104 methylation factor was computed, taking into account methylation at all CpG  
105 sites within the DMR. Associations between gene expression and DNA

106 methylation were measured using linear regressions with the first 4 principal  
107 components of the methylation data, sample batches, the first two components  
108 of estimated cell-type proportion, recruitment centres (dummy-coded) and sex  
109 as covariates.

110

### 111 **Methylation quantitative trait loci (mQTL)**

112 To determine the relationship between genetic variation and CpG methylation  
113 levels, we searched for mQTLs in several datasets. First, we interrogated the  
114 ARIES dataset <sup>9</sup> that includes DNA methylation collected from peripheral blood  
115 (or cord blood) at five different time points across the life course from individuals  
116 in the Avon Longitudinal Study of Parents and Children (ALSPAC) <sup>10</sup>. This  
117 dataset applied conservative multiple testing correction ( $p < 1 \times 10^{-14}$ ) to identify  
118 between 24,262 and 31,729 sentinel associations at each time point.

119 We complemented this search using data from the combined Lothian  
120 Birth Cohorts (1921 and 1936) <sup>11</sup>, and the Brisbane Systems Genetics Study <sup>12</sup>.  
121 The discovery and replication thresholds set in that study were  $P < 1 \times 10^{-11}$  and  
122  $P < 1 \times 10^{-6}$ , respectively, with both cohorts acting as a discovery ( $P < 1 \times 10^{-11}$ )  
123 and replication ( $P < 1 \times 10^{-6}$ ) data set (only the most significant SNP for each  
124 CpG was considered).

125

### 126 **Expression quantitative trait loci (eQTL)**

127 We used the Genotype-Tissue Expression (GTEx) database <sup>13</sup> to identify  
128 expression quantitative trait loci (*cis*-eQTLs; i.e., SNPs correlating with  
129 differential expression of neighbouring genes). This dataset, generated from 48  
130 tissues from 620 donors, tests for significant SNPs-genes pairs for genes within  
131 1Mb of input SNPs. The data described in this manuscript were obtained from  
132 the GTEx Portal (<https://gtexportal.org/home/>), Release: V7. It used FastQTL  
133 <sup>14</sup>, to map SNPs to gene-level expression data and calculate q-values based  
134 on beta distribution-adjusted empirical p-values. A false discovery rate (FDR)  
135 threshold of <0.05 was applied to identify genes with a significant eQTL. The  
136 effect sizes (slopes of the linear regression) were computed in a normalized  
137 space (i.e., normalised effect size (NES)), where magnitude has no direct  
138 biological interpretation. They reflect the effects of the alternative alleles relative  
139 to the reference alleles, as reported in the GTEx database.

140

#### 141 **Brain-blood methylation correlation**

142 We interrogated a searchable DNA methylation database <sup>15</sup>  
143 (<https://epigenetics.essex.ac.uk/bloodbrain/>) generated from matched DNA  
144 samples isolated from whole blood and 4 brain regions (prefrontal cortex,  
145 entorhinal cortex, superior temporal gyrus, and cerebellum) from 122  
146 individuals to establish the degree to which blood methylation levels at selected  
147 loci correlated with their brain methylation patterns. Correlations between blood

148 and brain methylation levels at individual CpG loci within DMRs were evaluated  
149 to indicate the similarity of methylation level between blood and brain tissues at  
150 these loci. In addition, the degree of these blood-brain co-variations (i.e. the  
151 extent to which of DNA methylation in blood correlated with DNA methylation in  
152 brain) at selected CpG loci and across DMRs were compared to their  
153 corresponding Z-values from the hippocampal EWAS. This comparison  
154 enabled us to evaluate the possible transmission of information from blood DNA  
155 methylation through brain DNA methylation to hippocampus volume.

156 It is important to point out that higher degree of blood-brain co-variations  
157 in methylation, which indicates a higher proportion of shared information  
158 between blood and brain, would result in increased strength in association  
159 between blood DNA methylation and hippocampus volume, solely if this  
160 association was indeed mediated by brain DNA methylation. Specifically, we  
161 used the following linear models to test if associations between hippocampus  
162 volume and blood DNA methylation (as found in our EWAS) were mediated by  
163 brain DNA methylation:

$$164 \quad \begin{aligned} BRM_{ij} &= BS_j + \varepsilon_{ij} \\ BLM_{ij} &= \beta_i \times BRM_{ij} + \eta_{ij} \end{aligned}$$

165 where  $BLM$ ,  $BRM$  and  $BS$  denote blood DNA methylation, brain DNA  
166 methylation and brain structure (i.e., hippocampus volume), respectively;  $\varepsilon_{ij}$  and  
167  $\eta_{ij}$  the residual terms of the first and second equations of the  $i$ th CpG site  
168 ( $i=0,1,2,\dots,m$ , where  $m$  indicates the number of CpG sites) from the  $j$ th individual

169 ( $j=0,1,2,\dots,n$ , where  $n$  indicates the number of individuals) with  $E_i(\varepsilon_{ij})=0$  ,  
 170  $Var_i(\varepsilon_{ij})=\rho_{\varepsilon_i}^2 > 0$  ,  $E_i(\eta_{ij})=0$  ,  $Var_i(\eta_{ij})=\rho_{\eta_i}^2 > 0$  and  $Cov_i(\varepsilon_{ij},\eta_{ij})=0$  ;  $\beta_i$  is the  
 171 parameters for the  $i$ th pair of brain and blood CpG site. We could then derive  
 172 the t-statistics at each CpG site for both correlations/associations (i.e. the brain-  
 173 blood co-variations in methylation and the correlation between blood DNA  
 174 methylation and hippocampus volume) as:

$$\begin{aligned}
 t_{BLM_i, BRM_i} &\sim \frac{Cor(BLM_i, BRM_i)}{\sqrt{1 - Cor^2(BLM_i, BRM_i)}} \\
 &= \frac{\beta_i \sqrt{Var(BS) + Var(\varepsilon_i)}}{\sqrt{Var(\eta_i)}} \\
 &= \frac{\beta_i \sqrt{\rho_{BS}^2 + \rho_{\varepsilon_i}^2}}{\rho_{\eta_i}}
 \end{aligned}$$

175

176 and

$$\begin{aligned}
 t_{BLM_i, BS} &\sim \frac{Cor(BLM_i, BS)}{\sqrt{1 - Cor^2(BLM_i, BS)}} \\
 &= \frac{\beta_i \sqrt{Var(BS)}}{\sqrt{\beta_i^2 Var(\varepsilon_i) + Var(\eta_i)}} \\
 &= \frac{\beta_i \rho_{BS}}{\sqrt{\beta_i^2 \rho_{\varepsilon_i}^2 + \rho_{\eta_i}^2}}
 \end{aligned}$$

177

178 , respectively, where  $\rho_A$  denotes the standard deviation of variable  $A$ , i.e. one of  
 179  $BS$ ,  $\varepsilon_i$  and  $\eta_i$ . If each of the two t-statistics shown above was observed from an  
 180 independent sample, we could have:

181

$$\begin{aligned}
Cor(t_{BLM_i, BRM_i}, t'_{BLM_i, BS}) &= E \left( \frac{\beta_i \sqrt{\rho_{BS}^2 + \rho_{\varepsilon_i}^2}}{\rho_{\eta_i}} \times \frac{\beta'_i \rho'_{BS}}{\sqrt{\beta_i'^2 \rho_{\varepsilon_i}^2 + \rho_{\eta_i}^2}} \right) - E \left( \frac{\beta_i \sqrt{\rho_{BS}^2 + \rho_{\varepsilon_i}^2}}{\rho_{\eta_i}} \right) \times E \left( \frac{\beta'_i \rho'_{BS}}{\sqrt{\beta_i'^2 \rho_{\varepsilon_i}^2 + \rho_{\eta_i}^2}} \right) \\
&= E \left( \frac{\rho'_{BS} \sqrt{\rho_{BS}^2 + \rho_{\varepsilon_i}^2}}{\rho_{\eta_i}} \right) \times E \left( \frac{\beta_i \beta'_i}{\sqrt{\beta_i'^2 \rho_{\varepsilon_i}^2 + \rho_{\eta_i}^2}} \right) - E \left( \frac{\rho'_{BS} \sqrt{\rho_{BS}^2 + \rho_{\varepsilon_i}^2}}{\rho_{\eta_i}} \right) \times E(\beta_i) \times E \left( \frac{\beta'_i}{\sqrt{\beta_i'^2 \rho_{\varepsilon_i}^2 + \rho_{\eta_i}^2}} \right) \\
&= E \left( \frac{\rho'_{BS} \sqrt{\rho_{BS}^2 + \rho_{\varepsilon_i}^2}}{\rho_{\eta_i}} \right) \times \left[ E \left( \frac{\beta_i \beta'_i}{\sqrt{\beta_i'^2 \rho_{\varepsilon_i}^2 + \rho_{\eta_i}^2}} \right) - E(\beta_i) \times E \left( \frac{\beta'_i}{\sqrt{\beta_i'^2 \rho_{\varepsilon_i}^2 + \rho_{\eta_i}^2}} \right) \right] \\
&= E \left( \frac{\rho'_{BS} \sqrt{\rho_{BS}^2 + \rho_{\varepsilon_i}^2}}{\rho_{\eta_i}} \right) \times Cor \left( \beta_i, \frac{\beta'_i}{\sqrt{\beta_i'^2 \rho_{\varepsilon_i}^2 + \rho_{\eta_i}^2}} \right)
\end{aligned}$$

182 , where  $\rho_{\varepsilon_i}^2$ ,  $\rho_{\eta_i}$ ,  $\rho_{\varepsilon_i}'^2$  and  $\rho_{\eta_i}'^2$  were assumed to be independent from each  
183 other. Clearly, a null result of  $Cor(t_{BLM_i, BRM_i}, t'_{BLM_i, BS})$  could be achieved if at least  
184 one of the two terms on the right-hand side of the last equation equals 0. While  
185 the first term can hardly reach 0 unless  $\rho'_{BS}$  equals 0, indicating the brain  
186 structure is identical among individuals from the second sample, and hence no  
187 transmission of information between the brain methylation and the brain  
188 structure (i.e. their correlation equals 0 at each methylation site), the second  
189 term reaches 0 only if  $\beta_i$  is independent from  $\beta'_i$ , i.e. the transmissions of  
190 information between blood and brain DNA methylations (i.e. the blood-brain co-  
191 variation) in the two samples are completely different. Therefore, a significant  
192 statistical test supporting  $Cor(t_{BLM_i, BRM_i}, t'_{BLM_i, BS}) > 0$  should indeed suggest a  
193 mediation role of DNA methylation in the proposed brain areas on the  
194 transmission of information between the blood DNA methylation and the brain  
195 structure of interest. Note no transmission direction (e.g. from blood DNA  
196 methylation to brain structure) could be derived from this approach.

197 We evaluated this transmission effect across all three DMRs, as well as  
198 within each DMR. When all three DMRs were analysed together, dummy  
199 variables were introduced to control for varied blood-brain correlation levels at  
200 each DMR. For each DMR, as the direction of transmission effect was expected  
201 to follow that of the EWAS, we applied one-tailed statistical tests (i.e. tests for  
202 the right tail in DMR1 and DMR2 and a test for the left tail in DMR3). Also of  
203 note, when investigating effects across all three DMRs, we reversed the sign of  
204 Z-values in DMR3 to harmonize the expected direction of associations.

205 An additional search was performed using data from blood and Brodmann  
206 areas 7, 10 and 20 from post-mortem samples of 16 individuals <sup>16</sup>.

207

### 208 **Enrichment analyses**

209 To test for enrichment for genomic regions found associated with hippocampal  
210 volume in our recent GWAS meta-analysis of hippocampal volume <sup>1</sup>, we  
211 performed analyses based on MAGENTA <sup>17</sup>, a computational tool designed for  
212 gene sets-based enrichment analyses with GWAS meta-analyses data as an  
213 input. To avoid “double dipping” in these analyses, we excluded the IMAGEN  
214 sample from the ENIGMA hippocampal volume meta-analysis, which we used  
215 as a dataset for known hippocampal volume SNPs (i.e., the ‘gene set’). We  
216 then tested for enrichment of this ‘gene set’ in the IMAGEN hippocampus  
217 EWAS results.

218 We modified the MAGENTA program to make it suitable for the analysis  
219 of DNA methylation data by first creating a 'gene set' of SNP regions by  
220 mapping SNPs to genomic locations, taking into account recombination  
221 hotspots. Adjacent regions with recombination rates lower than 10 were merged  
222 together. We then mapped CpG sites identified in the EWAS onto genomic  
223 regions if they fell within 100 kb of regions' boundaries. Regions were scored  
224 based on p-values of the most significant CpG in the region. In addition, Šidák  
225 correction <sup>7</sup> was applied to correct for confounders such as gene size. Regions  
226 with significant enrichment were identified by permutation testing, using 5000  
227 permutations. Two parameters were set to test for significant enrichment: *i*) the  
228 p-value threshold for selecting significant regions from the GWAS meta-  
229 analysis (GWAS thresholds of  $5 \times 10^{-6}$  and  $5 \times 10^{-7}$  were used) and *ii*) the cut-  
230 off threshold for each permutation: 90% and 99% cut-offs were used.

231

## 232 **ACKNOWLEDGEMENTS**

233 **ENIGMA:** The study was supported in part by grant U54 EB020403 from the  
234 NIH Big Data to Knowledge (BD2K) Initiative, a cross-NIH partnership, and by  
235 NIH grant R56 AG058854 to the ENIGMA World Aging Center.

236

237 **IMAGEN:** This work received support from the following sources: the European  
238 Union-funded FP6 Integrated Project IMAGEN (Reinforcement-related

239 behaviour in normal brain function and psychopathology) (LSHM-CT- 2007-  
240 037286), the Medical Research Foundation and Medical research council  
241 (grant MR/R00465X/1), the Horizon 2020 funded ERC Advanced Grant  
242 'STRATIFY' (Brain network based stratification of reinforcement-related  
243 disorders) (695313), ERANID (Understanding the Interplay between Cultural,  
244 Biological and Subjective Factors in Drug Use Pathways) (PR-ST-0416-10004),  
245 BRIDGET (JPND: BRain Imaging, cognition Dementia and next generation  
246 GENomics) (MR/N027558/1), the FP7 projects MATRICS (603016), the  
247 Innovative Medicine Initiative Project EU-AIMS (115300-2), the Medical  
248 Research Council Grant 'c-VEDA' (Consortium on Vulnerability to Externalizing  
249 Disorders and Addictions) (MR/N000390/1), the National Institute for Health  
250 Research (NIHR) Biomedical Research Centre at South London and Maudsley  
251 NHS Foundation Trust and King's College London, the Bundesministerium für  
252 Bildung und Forschung (BMBF grants 01GS08152; 01EV0711; eMED  
253 SysAlc01ZX1311A; Forschungsnetz AERIAL 01EE1406A, 01EE1406B), the  
254 Deutsche Forschungsgemeinschaft (DFG grants, SM 80/7-2, SFB 940/2, NE  
255 1383/14-1) and by NIH Consortium grant U54 EB020403, supported by a cross-  
256 NIH alliance that funds Big Data to Knowledge Centres of Excellence. Further  
257 support was provided by grants from: ANR (project AF12-NEUR0008-01 –  
258 WM2NA, and ANR-12-SAMA-0004), the Fondation de France, the Fondation  
259 pour la Recherche Médicale, the Mission Interministérielle de Lutte-contre-les-

260 Drogues-et-les-Conduites-Addictives (MILDECA), the Fondation pour la  
261 Recherche Médicale (DPA20140629802), the Fondation de l'Avenir, Paris Sud  
262 University IDEX 2012; the National Institutes of Health, Science Foundation  
263 Ireland (16/ERC/3797), U.S.A. (Axon, Testosterone and Mental Health during  
264 Adolescence; RO1 MH085772-01A1), the Swedish Research Council  
265 (Vetenskapsrådet), the Swedish Research Council for Health, Working Life and  
266 Welfare (FORTE), the Swedish Research Council FORMAS (grant number  
267 259-2012-23), the 111 Project (NO.B18015), the NSFC (81801773), the key  
268 project of Shanghai Science & Technology (No.16JC1420402), the Shanghai  
269 Municipal Science and Technology Major Project (No.2018SHZDZX01),  
270 ZHANGJIANG LAB, and the Shanghai Pujiang Project (18PJ1400900).

271

272 **LBC1936:** We thank the cohort participants and team members who  
273 contributed to these studies. Phenotype collection in the Lothian Birth Cohort  
274 1936 was supported by Age UK (The Disconnected Mind project). Methylation  
275 typing was supported by the Centre for Cognitive Ageing and Cognitive  
276 Epidemiology (Pilot Fund award), Age UK, The Wellcome Trust Institutional  
277 Strategic Support Fund, The University of Edinburgh, and The University of  
278 Queensland. Analysis of the brain images was funded by the Medical Research  
279 Council Grants G1001401, 8200, and MR/M01311/1. The imaging was  
280 performed at the Brain Research Imaging Centre, The University of Edinburgh

281 (<http://www.bric.ed.ac.uk>), a centre in the SINAPSE Collaboration  
282 (<http://www.sinapse.ac.uk>). The work was undertaken by The University of  
283 Edinburgh Centre for Cognitive Ageing and Cognitive Epidemiology  
284 (<http://www.ccace.ed.ac.uk>), part of the cross council Lifelong Health and  
285 Wellbeing Initiative (Ref. G0700704/84698); Funding from the Biotechnology  
286 and Biological Sciences Research Council and Medical Research Council  
287 (MR/K026992/1) are gratefully acknowledged. The Scottish Funding Council  
288 contributed support through the SINAPSE Collaboration.

289

290 **MPIP:** The MPIP sample comprises patients included in Munich Antidepressant  
291 Response Signature study and the Recurrent Unipolar Depression (RUD)  
292 Case-Control study. We acknowledge Rosa Schirmer, Elke Schreiter, Reinhold  
293 Borschke and Ines Eidner for image acquisition and data preparation. We thank  
294 Stella Iurato for supporting quality control procedures of the methylation  
295 measurements. The MARS project was supported by the German Federal  
296 Ministry of Education and Research (BMBF) through the NGFN and NGFN-  
297 Plus programs (FKZ 01GS0481), the Molecular Diagnostics program (FKZ  
298 01ES0811), the Research Network for Mental Diseases program (FKZ  
299 01EE1401D) and by the Bavarian Ministry of Commerce. This work was also  
300 funded by the German Federal Ministry of Education and Research (BMBF)  
301 through the Integrated Network IntegraMent (Integrated Understanding of

302 Causes and Mechanisms in Mental Disorders), under the auspices of the e:Med  
303 Programme (grant # 01ZX1314J to EB).

304

305 **NTR:** The NTR study was supported by the Netherlands Organization for  
306 Scientific Research (NWO), MW904-61-193 (Eco de Geus & Dorret Boomsma),  
307 MaGW-nr: 400-07- 080 (Dennis van 't Ent), MagW 480-04-004 (Dorret  
308 Boomsma), NWO/SPI 56-464-14192 (Dorret Boomsma), the European  
309 Research Council, ERC-230374 (Dorret Boomsma), and Amsterdam  
310 Neuroscience.

311

312 **OATS:** We thank the OATS participants and their supporters for their time and  
313 generosity in contributing to this research. We acknowledge the contribution of  
314 the OATS Research Team ([https://cheba.unsw.edu.au/project/older-australian-](https://cheba.unsw.edu.au/project/older-australian-twins-study)  
315 [twins-study](https://cheba.unsw.edu.au/project/older-australian-twins-study)). OATS was supported by an Australian National Health and  
316 Medical Research Council (NHMRC)/Australian Research Council Strategic  
317 Award (ID401162) and a NHMRC Project Grant (ID1045325). This research  
318 was facilitated through Twins Research Australia, a national resource in part  
319 supported by a NHMRC Centre for Research Excellence Grant (ID: 1079102).

320

321 **PAFIP:** This work was supported by the Instituto de Salud Carlos III  
322 (PI14/00639 and PI14/00918), MINECO (SAF2010-20840-C02-02 and

323 SAF2013-46292-R) and Fundación Instituto de Investigación Marqués de  
324 Valdecilla (NCT0235832 and NCT02534363). No pharmaceutical company has  
325 financially supported the study.

326

327 **QTIM:** Acknowledgements: We thank the twins and singleton siblings who gave  
328 generously of their time to participate in the QTIM study. We also thank the  
329 many research assistants, radiographers, and IT support staff for data  
330 acquisition and DNA sample preparation.

331 Funding Acknowledgements: National Institute of Child Health & Human  
332 Development (RO1 HD050735); National Institute of Biomedical Imaging and  
333 Bioengineering (Award 1U54EB020403-01, Subaward 56929223); National  
334 Health and Medical Research Council (Project Grants 496682, 1009064 and  
335 Medical Bioinformatics Genomics Proteomics Program 389891).

336

337 **SYS:** This work was funded by the Canadian Institutes of Health Research,  
338 Canadian Foundation for Innovation and Heart and Stroke Foundation of  
339 Canada.

340

341 **UMCU:** The UMCU cohort was supported by the Netherlands Organization for  
342 Health Research and Development (ZonMw) numbers 908-02-123 and 917-46-

343 370 (Hilleke Hulshoff Pol), and High Potential program (Hilleke Hulshoff Pol) of  
344 the Utrecht University.

345

346 **REFERENCES:**

347

- 348 1. Hibar DP, Stein JL, Renteria ME, Arias-Vasquez A, Desrivieres S,  
349 Jahanshad N *et al.* Common genetic variants influence human  
350 subcortical brain structures. *Nature* 2015; **520**(7546): 224-229.  
351
- 352 2. Sandoval J, Heyn H, Moran S, Serra-Musach J, Pujana MA, Bibikova M  
353 *et al.* Validation of a DNA methylation microarray for 450,000 CpG sites  
354 in the human genome. *Epigenetics* 2011; **6**(6): 692-702.  
355
- 356 3. Aryee MJ, Jaffe AE, Corrada-Bravo H, Ladd-Acosta C, Feinberg AP,  
357 Hansen KD *et al.* Minfi: a flexible and comprehensive Bioconductor  
358 package for the analysis of Infinium DNA methylation microarrays.  
359 *Bioinformatics* 2014; **30**(10): 1363-1369.  
360
- 361 4. Touleimat N, Tost J. Complete pipeline for Infinium((R)) Human  
362 Methylation 450K BeadChip data processing using subset quantile  
363 normalization for accurate DNA methylation estimation. *Epigenomics*  
364 2012; **4**(3): 325-341.  
365
- 366 5. Field AP. Is the meta-analysis of correlation coefficients accurate when  
367 population correlations vary? *Psychol Methods* 2005; **10**(4): 444-467.  
368
- 369 6. Pedersen BS, Schwartz DA, Yang IV, Kechris KJ. Comb-p: software for  
370 combining, analyzing, grouping and correcting spatially correlated P-  
371 values. *Bioinformatics* 2012; **28**(22): 2986-2988.  
372
- 373 7. Sidak Z. Rectangular Confidence Regions for the Means of Multivariate  
374 Normal Distributions. *Journal of the American Statistical Association*  
375 1967; **62**: 626-633.  
376
- 377 8. Sasik R, Calvo E, Corbeil J. Statistical analysis of high-density  
378 oligonucleotide arrays: a multiplicative noise model. *Bioinformatics* 2002;  
379 **18**(12): 1633-1640.  
380

- 381 9. Relton CL, Gaunt T, McArdle W, Ho K, Duggirala A, Shihab H *et al.* Data  
382 Resource Profile: Accessible Resource for Integrated Epigenomic  
383 Studies (ARIES). *Int J Epidemiol* 2015; **44**(4): 1181-1190.  
384
- 385 10. Gaunt TR, Shihab HA, Hemani G, Min JL, Woodward G, Lyttleton O *et al.*  
386 Systematic identification of genetic influences on methylation across  
387 the human life course. *Genome Biol* 2016; **17**: 61.  
388
- 389 11. Deary IJ, Gow AJ, Pattie A, Starr JM. Cohort profile: the Lothian Birth  
390 Cohorts of 1921 and 1936. *Int J Epidemiol* 2012; **41**(6): 1576-1584.  
391
- 392 12. McRae AF, Marioni RE, Shah S, Yang J, Powell JE, Harris SE *et al.*  
393 Identification of 55,000 Replicated DNA Methylation QTL. *Sci Rep* 2018;  
394 **8**(1): 17605.  
395
- 396 13. Consortium GT. The Genotype-Tissue Expression (GTEx) project. *Nat*  
397 *Genet* 2013; **45**(6): 580-585.  
398
- 399 14. Ongen H, Buil A, Brown AA, Dermitzakis ET, Delaneau O. Fast and  
400 efficient QTL mapper for thousands of molecular phenotypes.  
401 *Bioinformatics* 2016; **32**(10): 1479-1485.  
402
- 403 15. Hannon E, Lunnon K, Schalkwyk L, Mill J. Interindividual methylomic  
404 variation across blood, cortex, and cerebellum: implications for  
405 epigenetic studies of neurological and neuropsychiatric phenotypes.  
406 *Epigenetics* 2015; **10**(11): 1024-1032.  
407
- 408 16. Edgar RD, Jones MJ, Meaney MJ, Turecki G, Kobor MS. BECon: a tool  
409 for interpreting DNA methylation findings from blood in the context of  
410 brain. *Transl Psychiatry* 2017; **7**(8): e1187.  
411
- 412 17. Segre AV, Groop L, Mootha VK, Daly MJ, Altshuler D. Common inherited  
413 variation in mitochondrial genes is not enriched for associations with type  
414 2 diabetes or related glycemic traits. *PLoS Genet* 2010; **6**(8).  
415

416 **Supplementary Figure Legends:**

417 **Supplementary Figure 1:** Relationship between blood vs. brain correlation  
418 and association with hippocampal volume. The x-axis represents the effect (z-  
419 score) of individual CpGs within the listed DMR on hippocampal volume. The  
420 y-axis shows the corresponding correlation between DNA methylation in blood  
421 versus brain in 4 brain areas <sup>56</sup> at these CpGs. Generally, stronger effects are  
422 observed for CpG sites whose methylation levels are highly correlated in at  
423 least one tissue.

424

425 **Supplementary Figure 2:** Comparison between DNA methylation in blood and  
426 in three brain regions (BA7, BA10 and BA20) in paired samples from 16  
427 individuals <sup>57</sup>. Metrics shown for CpG sites composing each of the 3 DMRs,  
428 include spearman correlation values of methylation between blood and the  
429 listed brain region, methylation variability in blood and brain samples and  
430 average methylation change with cell composition adjustment.

431

432 **Supplementary Figure 3:** Expression quantitative trait loci analyses showing  
433 effects of rs4441859 and rs131758 genotypes on *CMYA5* and *CPT1B*  
434 expression in tissues from 620 donors from the Genotype-Tissue Expression  
435 (GTEx) database <sup>76</sup>. Effects fulfilling the FDR threshold of  $\leq 0.05$  are highlighted  
436 in red.
